# Supplementary material for: Dual-matrix fiber-reinforced lightweight ablative thermal protection composites with outstanding micron-scale ablative recession
Source: Research Square preprint supplement (doi:10.21203/rs.3.rs-3624011/v1), 2023-11-29
Supplement: Supplementary file 1 [file 10f21224711f58ca0dcbe770.docx]

Table S1 Ceramicizable resin mixing mass ratio

|  | ZrB2 particle | SiC particle | Silica resin |
| --- | --- | --- | --- |
| S0QRP | 0 | 0 | 4 |
| S1QRP | 3 | 0 | 1 |
| S2QRP | 1.5 | 1.5 | 1 |
| S3QRP | 2.25 | 0.75 | 1 |
