# Supplementary material for: Dual-matrix fiber-reinforced lightweight ablative thermal protection composites with outstanding micron-scale ablative recession
Source: Research Square preprint supplement (doi:10.21203/rs.3.rs-3624011/v1), 2023-11-29
Supplement: Supplementary file 2 [file b4e050b462f18e51c2fe73a5.docx]

**Supporting Information**

**3.2. Chemical structure and thermal stability of dual matrix**

In-depth analysis of the FTIR and XPS spectra for the dual matrix reveals significant characteristic peaks. For FTIR spectra of CR matrix, peaks at 1595 and 1431 cm-1 represent the vibrational absorption of the benzene ring. Additionally, peaks at 3073, 3051, 2963, and 697 cm-1 correspond to C-H on the benzene ring. Peaks at 1264, 845, and 803 cm-1 represent vibrational absorption of the methyl group. Notably, the peaks at 1135 and 1027 cm-1 pertain to the -Si-O-Si- anti-symmetric stretching vibration. The presence of two double peaks of similar intensity suggests the formation of long-chain molecules. For PRa matrix, the peaks at 2924 and 1466 cm-1 represent -CH2- groups connected to the benzene ring. Peaks at 1109 and 968 cm-1 correspond to -C-O-C-. The peaks at 2228 and 1272 cm-1 are characteristic of -C-N-C- originating from HMTA. Furthermore, the peaks at 794 cm-1 suggest the presence of -Si-O- groups from silane, while peaks at 1717 and 1610 cm-1 indicate the presence of -C=C- bonds. In XPS spectra of CR, the C 1s spectra at 284.2, 285.0 and 288.5 eV correspond to C-Si, C=C, and C=O bonds, respectively, with 282.5 eV corresponding to ceramic SiC. The Si 2p spectra at 102.5 and 100.1 eV correspond to Si-O and Si-C bonds, respectively. In terms of PRa, the C 1s spectrum at 285.45 eV corresponds to C-O bonds, while the Si 2p spectrum reveals peaks at 104.7, 103.9, and 103.3 eV, corresponding to Si-C, Si-O-C, and Si-OH, respectively.

To assess thermal stability, SR, CR, and PRa were tested in an argon atmosphere from room temperature to 1100°C. The weight loss patterns of SR and CR are similar, with rapid weight loss at 460.3°C due to the detachment of side-chain methyl groups and benzene rings, significant thermal loss at 563.8°C attributed to the breakage of C=C and Si-O bonds, and a loss at 744.1°C, possibly originating from the vaporization of B2O3 from the ceramic particles. The presence of ceramic particles in CR results in higher weight retention at 1100°C. In PRa, substantial weight loss occurs at 546.2°C, arising from the breakage of -CH2- bridges and benzene rings. Additional thermal weight loss data are provided in Table S2.

Table S2 Characteristic temperature and weight loss of resin matrix

| Samples | T5%  (℃) | T10%  (℃) | Td, max  (℃) | R1100℃  (%) | 200-400℃  (%) | 400-800℃  (%) | 800-1000℃  (%) |
| --- | --- | --- | --- | --- | --- | --- | --- |
| SiR | 415.88 | 463.32 | 563.8 | 60.50 | 4.06 | 34.45 | 0.90 |
| C1R | 518.96 | - | 563.8 | 90.07 | 2.03 | 7.67 | 0.21 |
| C2R | 533.66 | - | 563.8 | 91.65 | 1.67 | 6.52 | 0.16 |
| C3R | 547.47 | - | 563.8 | 90.86 | 1.85 | 7.09 | 0.19 |
| PRa | 360.57 | 440.92 | 546.20 | 63.10 | 7.40 | 28.39 | 0.43 |

Note: T5%, Characteristic temperature at 5% weight loss; T10%, Characteristic temperature at 10% weight loss; Td, max, Characteristic temperature at the maximal rate of weight loss; R1100°C, Residual weight at 1100°C.

**3.3. Evaluation of mechanical strength and thermal insulation**

The micro-nano pore structure of the phenolic aerogel and the internal porous structure of the composite based on PRa were tested separately. Detailed data can be found in Table S3. To evaluate the thermal insulation performance of the composites during dynamic ablation, specimens measuring φ30*30 mm3 were subjected to a butane flame for 1200 seconds. Backside temperatures were recorded using a thermal imaging camera, as illustrated in Fig. (9-10). The temperature at the backside of the specimens experienced a rapid increase at approximately 700 seconds, indicating the transfer of heat from the flame ablation. The equilibrium backside temperature of the specimens stabilized at around 450°C.

Table S3 The pore-structure parameters of the prepared PRa and PRa/NQF

| Samples | SBET (m2/g) | Smic (m2/g) | Smeso (m2/g) | Vmic (cm3/g) | Vmeso (cm3/g) | DBET (nm) | Dmeso (nm) |
| --- | --- | --- | --- | --- | --- | --- | --- |
| PRa | 45.286 | 2.072 | 38.844 | 0.0002 | 0.161 | 8.338 | 16.942 |
| CIT/PR | 12.936 | - | 12.577 | - | 0.0525 | 8.734 | 16.599 |

Note: SBET, BET surface area; Smic, micropore surface area; Smeso, BJH Desorption cumulative surface area of pores Between 1.7 and 300 nm diameter; Vmic, micropore volume; Vmeso,BJH desorption cumulative pore volume of pores between 1.7 and 300 nm diameter; DBET, Desorption average pore diameter (4V/A by BET); Dmeso, BJH Desorption average pore diameter (4V/A).


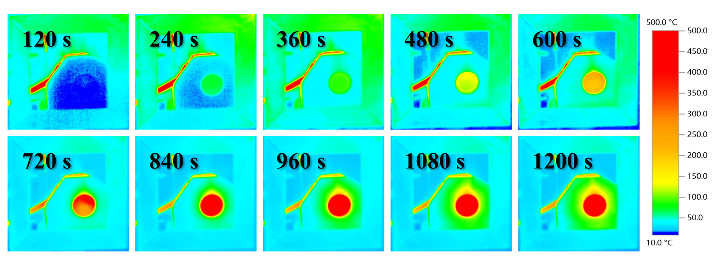


Fig.9. Cloud map of backside temperature distribution during 1200 second ablation


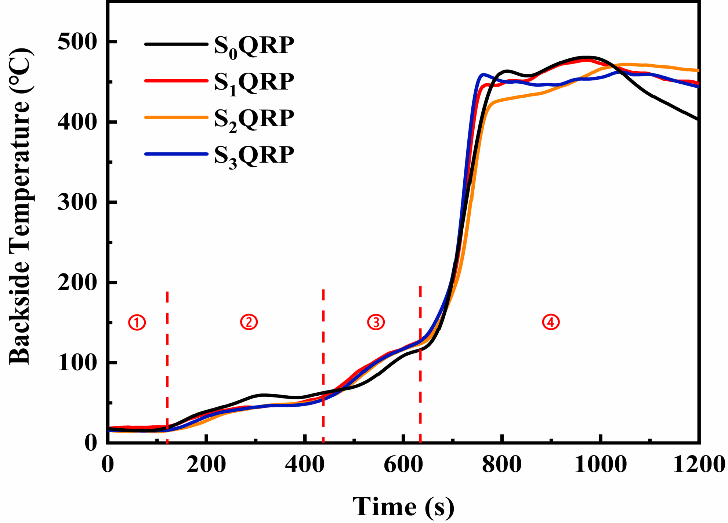


Fig.10. Backside temperature curves during 1200 second ablation

**3.3. Evaluation of ablative thermal protection**

To evaluate the thermal protection performance of the composites, specimens measuring φ30*30 mm3 were subjected to an oxy-acetylenee flame. The 1.5MW (90 seconds) and 1.5MW (60 seconds) ablation tests were carried out respectively. The data of the specimens before and after ablation are shown in Table S4 and Table S5.

Table S4 Ablation data of SQRP composite (1.5MW for 90s)

| Sample | *L0* (mm) | *Lα* (mm) | *RL* (μm/s) | *M0* (g) | *Mα* (g) | *RM* (mg/s) |
| --- | --- | --- | --- | --- | --- | --- |
| S0QRP | 27.4 | 25.9 | 1.67 | 7.83 | 6.69 | 12.67 |
| S1QRP | 27.2 | 27.0 | 0.22 | 7.84 | 7.01 | 9.23 |
| S2QRP | 27.0 | 26.9 | 0.11 | 7.83 | 7.00 | 9.22 |
| S3QRP | 27.4 | 26.8 | 0.67 | 7.74 | 6.88 | 9.56 |

Note: L0: original thickness, Lα: final thickness, RL: linear ablation rate, M0: original mass, Mα: final mass, and RM: mass ablation rate.

Table S5 Ablation data of SQRP composite (3.6MW for 60s)

| Sample | *L0* (mm) | *Lα* (mm) | *RL* (μm/s) | *M0* (g) | *Mα* (g) | *RM* (mg/s) |
| --- | --- | --- | --- | --- | --- | --- |
| S0QRP | 27.0 | 26.5 | 10.00 | 7.83 | 5.16 | 53.40 |
| S1QRP | 28.0 | 27.6 | 8.00 | 8.04 | 7.20 | 16.80 |
| S2QRP | 27.0 | 26.7 | 6.00 | 7.64 | 6.72 | 18.40 |
| S3QRP | 27.4 | 27.1 | 8.00 | 7.40 | 6.25 | 19.20 |

Note: L0: original thickness, Lα: final thickness, RL: linear ablation rate, M0: original mass, Mα: final mass, and RM: mass ablation rate.

**3.6. Evaluation of thermal protection under repeated ablation**

The S2QRP specimen was selected and repeated ablation with butane flame ten times, and the surface and side images are shown in Fig. 10, where the center of the flame (within the yellow dotted line) region was observed for surface contouring using a laser microscope.


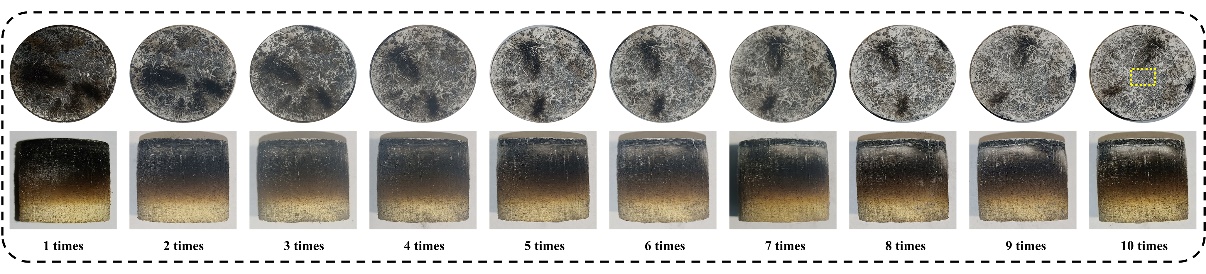


Fig.10. Images of the butane repeated ablation specimen

Table S6 Repeated ablation data of S2QRP (butance flame for 300 seconds)

|  | *L0* (mm) | *Lα* (mm) | *RL* (μm/s) | *M0* (g) | *Mα* (g) | *RM* (mg/s) |
| --- | --- | --- | --- | --- | --- | --- |
| 1 times | 27.30 | 27.29 | 0.03 | 6.59 | 6.03 | 1.87 |
| 2 times | 27.29 | 27.29 | - | 6.03 | 5.88 | 0.50 |
| 3 times | 27.29 | 27.29 | - | 5.88 | 5.77 | 0.37 |
| 4 times | 27.29 | 27.29 | - | 5.77 | 5.68 | 0.30 |
| 5 times | 27.29 | 27.28 | 0.03 | 5.68 | 5.68 | - |
| 6 times | 27.28 | 27.28 | - | 5.68 | 5.68 | - |
| 7 times | 27.28 | 27.28 | - | 5.68 | 5.68 | - |
| 8 times | 27.28 | 27.28 | - | 5.68 | 5.68 | - |
| 9 times | 27.28 | 27.28 | - | 5.68 | 5.67 | 0.03 |
| 10 times | 27.28 | 27.28 | - | 5.67 | 5.67 | - |

Note: L0: original thickness, Lα: final thickness, RL: linear ablation rate, M0: original mass, Mα: final mass, and RM: mass ablation rate.
